# Supplementary material for: Obatoclax kills anaplastic thyroid cancer cells by inducing lysosome neutralization and necrosis
Source: PubMed Central journal article supplement (PMC5085168; doi:10.18632/oncotarget.9121), 2016-04-30
Supplement: oncotarget-07-34453-s001.pdf [file oncotarget-07-34453-s001.pdf]

# Obatoclox kills anaplastic thyroid cancer cells by inducing lysosome neutralization and necrosis

## Supplementary Materials

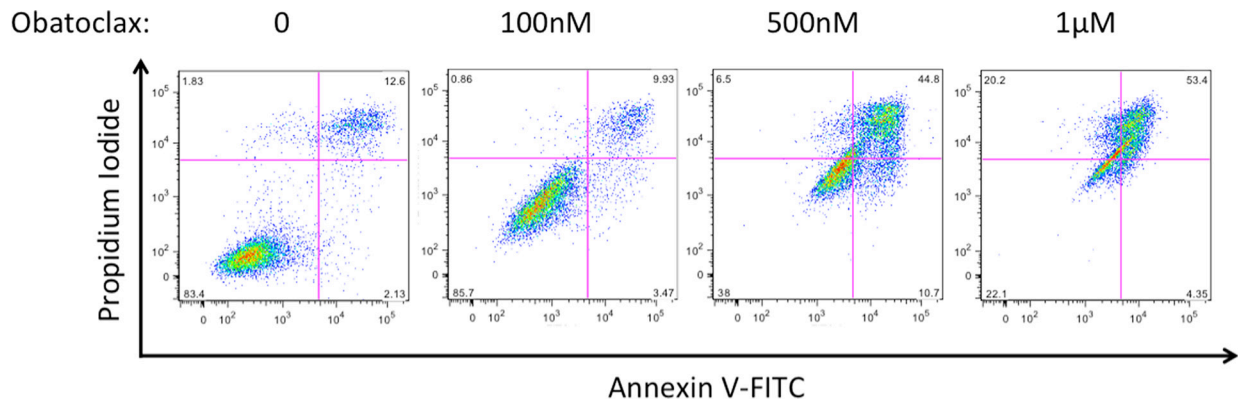

**Supplementary Figure S1: Obatoclox autofluorescence affects apoptosis detection.** Flow cytometric analysis of D316 cells treated with vehicle or different Obatoclox concentrations for 12 hours and then stained with Annexin V-FITC and Propidium iodide. Note the dose-dependent shift of the live cell population, which becomes fluorescent in both channels upon Obatoclox treatment, in a dose-dependent manner.

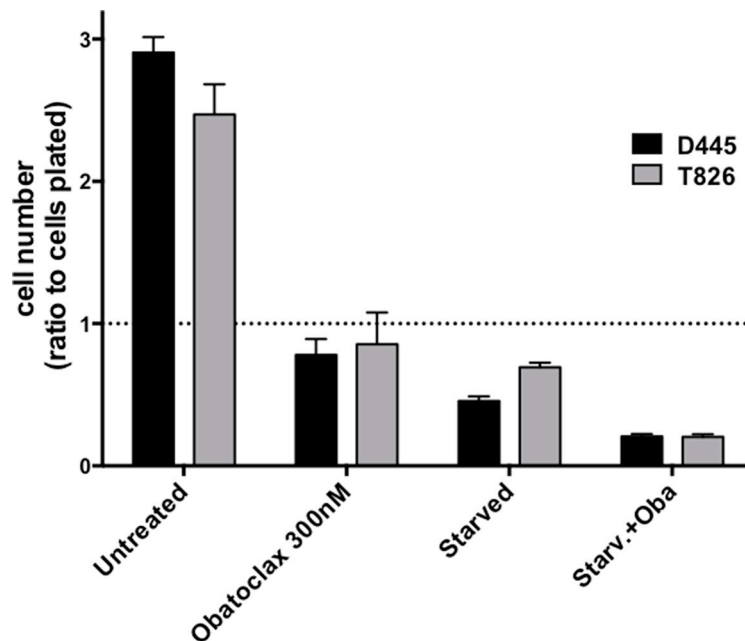

**Supplementary Figure S2: Starved cells are more sensitive to Obatoclox.** Relative cell numbers of mouse thyroid cancer cells treated with Obatoclox (300 nM) in complete medium or under starving conditions (HBSS containing 1% of normal medium) for 24 hrs.

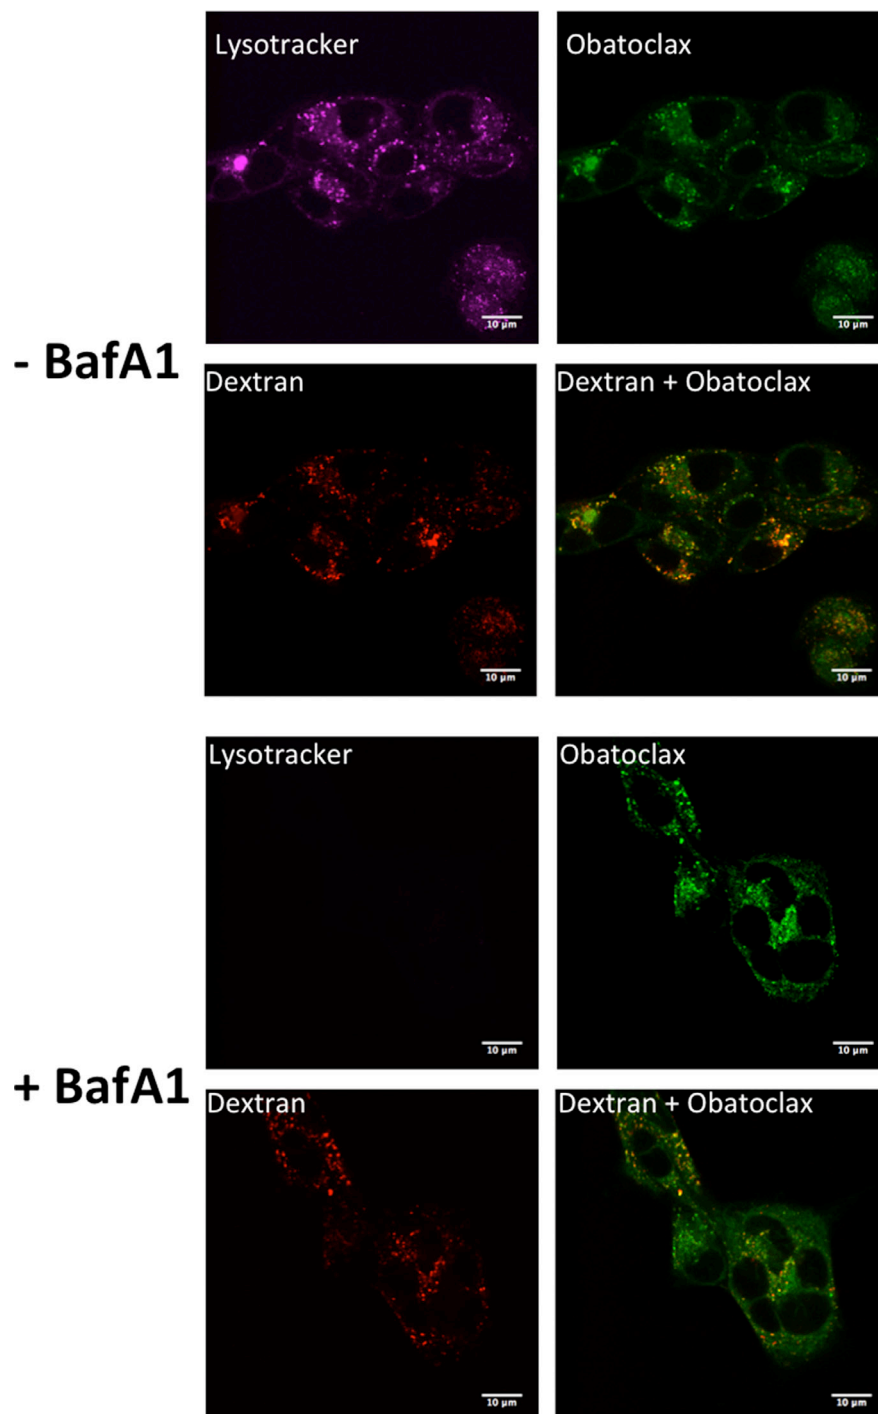

**Supplementary Figure S3: Obatoclax localization to the lysosomes is independent of an acidic environment.** Lysotracker, dextran and Obatoclax fluorescence visualized in D445 cells cultured in the absence or presence of Bafilomycin (BafA1) pre-treatment.

**Supplementary Movie S1: Time-lapse microscopy (one image/min) of D445 cells loaded with Lysotracker, over the course of 40 min.**

**Supplementary Movie S2: Time-lapse microscopy (one image/min) of D445 cells treated with Obatoclax, over the course of 40 min.**

**Supplementary Movie S3: Time-lapse microscopy (one image/min) of D445 cells loaded with Lysotracker and then treated with Obatoclax, over the course of 40 min.** Green channel: Obatoclax signal.

**Supplementary Movie S4: Time-lapse microscopy (one image/min) of D445 cells loaded with Lysotracker and then treated with Obatoclax, over the course of 40 min.** Red channel: Lysotracker signal.
